# Supplementary material for: E3 ligase RNF5 inhibits type I interferon response in herpes simplex virus keratitis through the STING/IRF3 signaling pathway
Source: Frontiers journal article supplement (doi:10.3389/fmicb.2022.944101), 2022-08-02
Supplement: Table_1.xlsx [file Table_1.xlsx]

## Sheet: Figure1A
0dpi	3dpi
1	1.59883
1	1.51359
1	1.39151
1	1.99844
1	1.37957
1	1.81029
1	1.76188
1	1.51903
1	1.98181
1	2.44381
1	2.34585
1	2.91849

## Sheet: Figure1B
0hpi	12hpi
1	1.59997
1	2.62929
1	5.50266
1	4.17857
1	2.72216
1	1.35059
1	1.95114
1	1.35563
1	5.32827

## Sheet: Figure2B
LEFT				RIGHT
siRNA-Control	siRNA-RNF5			OE-Control	OE-RNF5
1	0.296763			1	2.12483
1	0.13167			1	2.22863
1	0.204575			1	2.91696
				1	1.73919
				1	2.25373

## Sheet: Figure2C
LEFT				RIGHT
siRNA-Control	siRNA-RNF5			OE-Control	OE-RNF5
1	0.351111			1	2.67586
1	0.363493			1	2.63902
1	0.287175			1	2.90795

## Sheet: Figure3B
siRNA-Control	siRNA-RNF5
1	1.87905
1	0.786762
1	2.42503
1	2.6087
1	1.98252
1	1.77933
1	2.36199
1	2.67586
1	2.58471

## Sheet: Figure3C
OE-Control	OE-RNF5
1	0.510506
1	0.602904
1	0.237336
1	0.247414
1	0.265172
1	0.297989
1	0.537126
1	0.480742

## Sheet: Figure4B
siRNA-Control	siRNA-RNF5
1	0.414276
1	0.329241
1	0.208178

## Sheet: Figure5A
	siRNA-Control			siRNA-RNF5
1dpi	4	4.5	4.6	3.5	2.6	3.6
3dpi	3.4	3.6	3.7	2.6	2.7	3
5dpi	2.75	2	2.5	1.9	1.5	1.6

## Sheet: Figure5B
siRNA-Control	siRNA-RNF5
4	1
4	1
3	1
3	1
3	2
3	2
2	1
2	1

## Sheet: Figure6B
siRNA-Control	siRNA-RNF5
1	0.296763
1	0.400232
1	0.204575
1	0.757956
1	0.332209
1	0.749522
1	0.563263
1	0.678427

[truncated: 2 more sheets: Figure6C, Figure6D]
